# Supplementary material for: Non-Invasive Measurement of Exercise-Induced Oxidative Stress in Response to Physical Activity. A Systematic Review and Meta-Analysis
Source: MDPI journal article supplement (doi:10.3390/antiox10122008), 2021-12-17
Supplement: s1 [file s1]

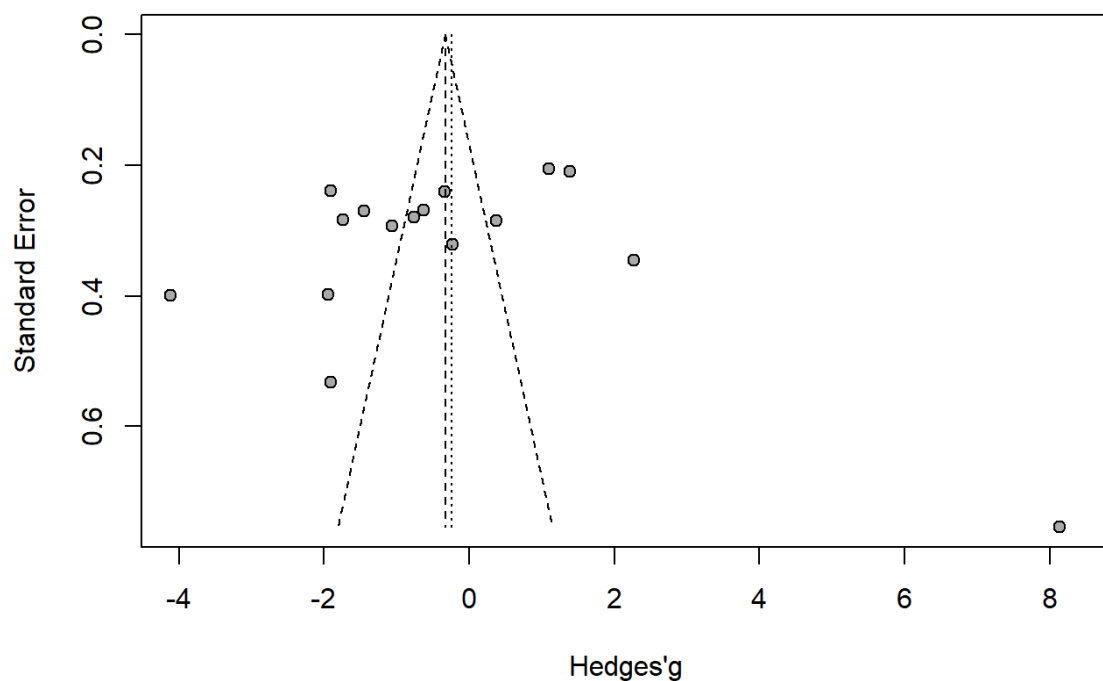

Figure S1: Publication bias test for meta-analysis focusing on the effect of physical activity on urinary 8-oxo-dG or 8-OH-dG, evaluated by Funnel plot and Hedges' g (not significant), both indicating absence of publication bias.

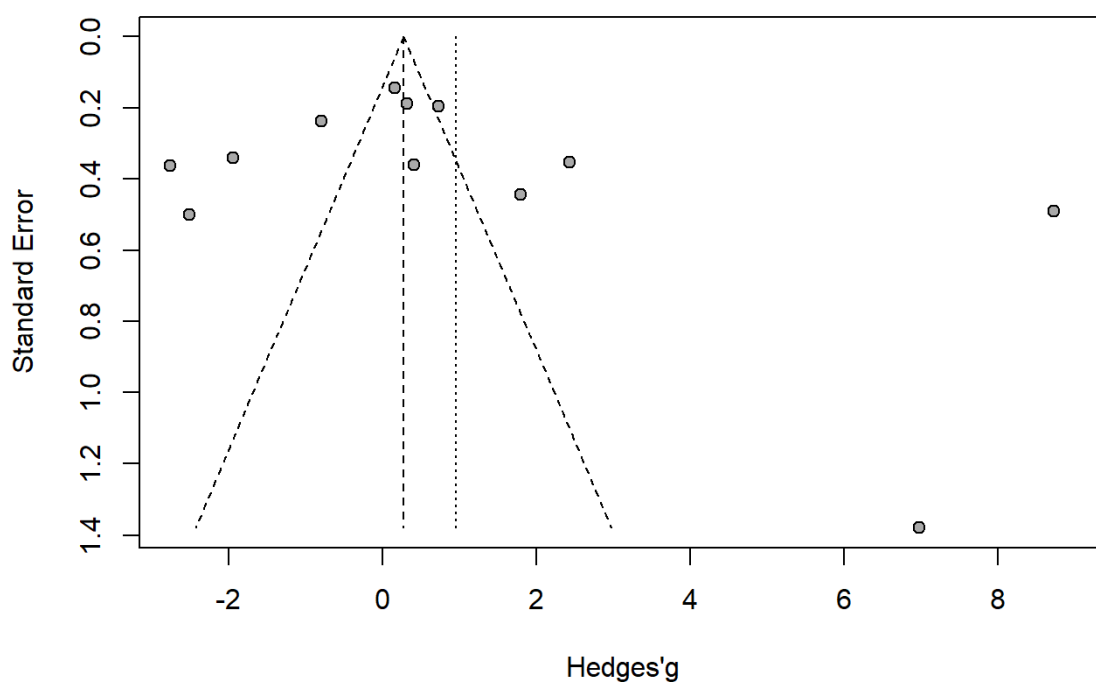

Figure S2: Publication bias test for meta-analysis focusing on the effect of physical activity on urinary isoprostanes, evaluated by Funnel plot and Hedges' g (not significant), both indicating absence of publication bias.
